# Supplementary material for: Bimetallic Pd-Co Nanoparticles Supported on Nitrogen-Doped Reduced Graphene Oxide as Efficient Electrocatalysts for Formic Acid Electrooxidation
Source: MDPI journal article supplement (doi:10.3390/catal11080910), 2021-07-28
Supplement: s1 [file s1]

**Table 1S: Composition of the Catalysts by XPS and EDX (atomic percentage)**

| Catalysts                                 | Carbon |       | Nitrogen |      | Oxygen |      | Palladium |      | Cobalt |      |
|-------------------------------------------|--------|-------|----------|------|--------|------|-----------|------|--------|------|
|                                           | XPS    | EDX   | XPS      | EDX  | XPS    | EDX  | XPS       | EDX  | XPS    | EDX  |
| <b>Pd/N-rGO</b>                           | 94.36  | 92.2  | 1.88     |      | 0.8    | 4.78 | 2.01      | 1.90 | --     | -    |
| <b>Pd<sub>1</sub>Co<sub>1</sub>/CNT</b>   |        | 93.96 |          | 0    |        | 2.61 |           | 2.34 |        | 0.53 |
| <b>Pd<sub>1</sub>Co<sub>1</sub>/N-rGO</b> | 89.36  | 85.89 | 1.0      | 2.96 | 8.13   | 6.0  | 1.12      | 3.34 | 0.38   | 0.69 |
